# Supplementary material
Source: PubMed Central journal article supplement (PMC2245843)
Supplement: plntphys_pp.107.113639_1.pdf [file plntphys_pp.107.113639_1.pdf]

**Supplemental table S1.** List of forward (F) and reverse primers (R).

| Primers name | Sequences (5'-3')             |
|--------------|-------------------------------|
| ntr1F        | caccgacgtcgagaactt            |
| ntr1R        | aaagacccccctccacact           |
| ntr2F        | ggccgccaacgggatgga            |
| ntr2R        | gtggccacgtaccctcggagtc        |
| ntr3F        | cgagctcgactcaaaggggtacg       |
| ntr3R        | ccagtgcccaacttatattcccaccca   |
| ntr4F        | ccgtagccaagcctagcag           |
| ntr4R        | atacccatcggcattggag           |
| ntr5F        | gagctccatgccgatg              |
| ntr5R        | agacatgttctcactccaaaca        |
| ntr6R        | ggatcctcaatcagtcttcccttctgtgc |
| ntr8F        | atacatatggagggatccgccgcg      |
| ntr8R        | ataatactcgagtgcggcttccggcgag  |
| ntr10F       | catatggaggaggcggccg           |
| ntr10R       | ggatcctcaatgagtcttccctt       |
| trxh8        | tccatattggccgccgaggaggaggag   |
| trxh9        | ggggatcctaaccgggcaatcactcttc  |
| trxh10F      | aggtgatctcgggtccaca           |
| trxh10R      | cggtcagttcctccttgata          |
| 18srRNAF     | ctacgtccctgccctttgtaca        |
| 18srRNAR     | acacttcaccggaccattcaa         |
