# Supplementary material
Source: PubMed Central journal article supplement (PMC2245843)
Supplement: plntphys_pp.107.113639_2.pdf [file plntphys_pp.107.113639_2.pdf]

Supplemental Figure S1

At7 MAASPKIGIGIASVSSPHRVSAASSALSPPPHLFFLTTTTTTRHGGSYLLRQPTRTRSSD 60  
 At8 MAASPKIGIGIASVSSPHRVSAASSALSPPPHLFFLTTTTTTRHGGSYLLRQPTRTRSSD 60  
 Os8 -MAVTRLAVAAAALSAKALRASAAP----- 23  
 Hv3 -----  
 Mt2 -MATAKIGLFGVATLPPTHNHRITTASSHHRFIFINS-----RRSLRTRSSS 46  
 Ol -MRTHARAVAAVKVTTTTTTRASHARANRCRRSTIDAR-----ARRART 43  
 Te -----  
 Ns -----MFSCHSPCRS----- 10  
 Pm -----  
 At1 -----MCWISMSQSRFIIKSLFSTAGGFLLGSALSNPSSL 35  
 At5 -----  
 At2 -----MNCVSRCLKLISKARSFAR-LGGESTLSQPPSL 32  
 At4 -----  
 At3 -----  
 At6 -----  
 Mt1 -----MKFRFCPNNNWITLFNKARNLISTQ 25  
 Os2 -----  
 Os3 -----  
 Os1 -----  
 Hv2 -----  
 Hv1 -----  
 Ta -----  
 Os4 -----  
 Os5 -----  
 Os6 -----MRLCSKLAALLRRSRQFAPAAAAA 24  
 Os7 -----MRLCSKLAALLRRSRQFAPAAAAA 24  
 Nc -----  
 Pc -----  
 Sc -----  
 Ec -----  
 Yp -----  
 Hi -----

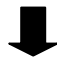

At7 SLRLRVSATANSPSSSSSGGEIIENVVIIIGSGPAGYTAAYAAANLKPVVFEQYQMGV 120  
 At8 SLRLRVSATANSPSSSSSGGEIIENVVIIIGSGPAGYTAAYAAANLKPVVFEQYQMGV 120  
 Os8 ---AVDEEAPASPPPSDLGKGVENLVIIGSGPAGYTAAYAAANLKPVVFEQYQVGGV 79  
 Hv3 -----PGRGVENLVIIGSGPAGYTAAYAAANLKPVVFEQYQVGGV 42  
 Mt2 SLTLRASSDTSSSSVAS-PGNAVENVVIIGSGPAGYTAAYAAANLKPVVFEQYQMGV 105  
 Ol TTTTTTTRASAQEQUATEDAPDVENCVIIGSGPAGYTAAYAGRANLRPLMFEGFQAGGV 103  
 Te -----MTPPRIENVVIIIGSGPAGYTAAYAAANLKPPLMFEGYQIGGL 43  
 Ns DMLCYIKRSRYEFVINIMSNPTVENLVIIGSGPAGYTAAYAAANLKPVVFEQYQAGGL 70  
 Pm -----METKVKEDNVENLVIIGSGPAGYTAAYAAANLQPLLVTGFNSGGI 47  
 At1 ATAFSSSSSSSSAAAADMETHKTKVCIVGSGPAAHTAAYASRAELKPLLFEGWMANDI 95  
 At5 -----LKPLLFEGWMANDI 14  
 At2 A-----SAAFSSSAVMNGLETHNTRLCIVGSGPAAHTAAYAAARELKPLLFEGWMANDI 87  
 At4 -----MNGLETHNTRLCIVGSGPAAHTAAYAAARELKPLLFEGWMANDI 45  
 At3 -----MNGLETHNTRLCIVGSGPAAHTAAYAAARELKPLLFEGWMANDI 45  
 At6 -----MNGLETHNTRLCIVGSGPAAHTAAYAAARELKPLLFEGWMANDI 45  
 Mt1 RASVSSAASATAMTDTTTLPTVKTKLCIIGSGPAAHTAAVYAARELKPILFEGWMANDI 85  
 Os2 -----MEGSAGAPLRTRVCIIGSGPSAHTAAYAAARELKPVLFEQWLANDI 47  
 Os3 -----MEGSAGAPLRTRVCIIGSGPSAHTAAYAAARELKPVLFEQWLANDI 47  
 Os1 -----MEGSAGAPLRTRVCIIGSGPSAHTAAYAAARELKPVLFEQWLANDI 47  
 Hv2 -----MEGSAAAPLRTRVCIIGSGPAAHTAAYAAARELKPVLFEQWMANDI 47  
 Hv1 -----MEEAAAGPLRTRVCIIGSGPAAHTAAVYAARELKPVLFEQWLANDI 47  
 Ta -----MEEAAAGPLRTRVCIIGSGPAAHTAAVYAARELKPVLFEQWLANDI 47  
 Os4 -----MEEAAAGPLRARVCIIGSGPAAHTAAVYAARELKPVLFEQFLANDI 47

|     |      |                               |              |                                 |                                  |    |
|-----|------|-------------------------------|--------------|---------------------------------|----------------------------------|----|
| Os5 | ---- | CASAPSSRRCSSGGPAGPLRARVCI     | I            | GSGPAAHTAAVYAARAELKPVLFEGFLANDI | 56                               |    |
| Os6 |      | SGSATAAAAASANGMEEAAAGPLRARVCI | I            | GSGPAAHTAAVYAARAELKPVLFEGFLANDI | 84                               |    |
| Os7 |      | SGSATAAAAASANGMEEAAAGPLRARVCI | I            | GSGPAAHTAA-----                 | 63                               |    |
| NC  |      | -----                         | MHSKVVII     | I                               | GSGPAAHTAAIYLARAELKPVLYEGFMANGI  | 39 |
| Pc  |      | -----                         | MVHSKVVII    | I                               | GSGGAGAHTAAIYLSRAELQPVLYEGMLANGT | 40 |
| Sc  |      | -----                         | MVHNKVTII    | I                               | GSGPAAHTAAIYLARAELKPVLYEGMMANGI  | 40 |
| Ec  |      | -----                         | MGTTKHSKLLII | I                               | GSGPAGYTAAVYAARANLQPVLYITGMEK--- | 40 |
| Yp  |      | -----                         | MSTAKHSKLIII | I                               | GSGPAGYTAAVYAARANLQPVLYITGMEK--- | 40 |
| Hi  |      | -----                         | MSDIKHAKLLII | I                               | GSGPAGYTAAYAAARANLQPVLYITGMEK--- | 40 |

|     |  |                              |                                          |                                  |     |
|-----|--|------------------------------|------------------------------------------|----------------------------------|-----|
| At7 |  | P-GGQLMTTTEVENFPGFPDGITGPDLM | MEKMRKQAERWGAELYPEDVESLSVTTAPFTVQ        | 179                              |     |
| At8 |  | P-GGQLMTTTEVENFPGFPDGITGPDLM | MEKMRKQAERWGAELYPEDVESLSVTTAPFTVQ        | 179                              |     |
| Os8 |  | P-GGQLMTTTEVENFPGFPDGVTPDLM  | DKMRKQAERWGAELHQEDVEFVNVKSRPFVIR         | 138                              |     |
| Hv3 |  | P-GGQLMTTTEVENFPGFPDGITGPDLM | DKMRKQAERWGAELHQEDVEFVDVKSRRPFVIR        | 101                              |     |
| Mt2 |  | P-GGQLMTTTEVENFPGFPDGITGPDLM | DRMRQAERWGAELHHEDVEAIDVKTSPFTVQ          | 164                              |     |
| Ol  |  | P-GGQLMTTTEVENFPGFPDGVTPDLM  | DKMRKQAERWGAVMHTEDVTVDFTSRPFVIR          | 162                              |     |
| Te  |  | P-GGQLMTTTEVENFPGFPDGVTPDLM  | DKMRKQAERWGTEMVTEVDVIQVDFSRPFVIR         | 102                              |     |
| Ns  |  | P-GGQLMTTTEVENFPGFPDGVTPDLM  | DKMRKQAERWGTEMVTEVDVIQVDFSRPFVIR         | 129                              |     |
| Pm  |  | P-GGQLMTTTFVENYPGFPDGVTPDLM  | DKMRKQAERWGTEMVTEVDVIQVDFSRPFVIR         | 106                              |     |
| At1 |  | APGGQLTTTTDVENFPGFPDGVTPDLM  | DKMRKQAERWGTEMVTEVDVIQVDFSRPFVIR         | 155                              |     |
| At5 |  | APGGQLTTTTDVENFPGFPDGVTPDLM  | DKMRKQAERWGTEMVTEVDVIQVDFSRPFVIR         | 74                               |     |
| At2 |  | APGGQLTTTTDVENFPGFPDGVTPDLM  | DKMRKQAERWGTEMVTEVDVIQVDFSRPFVIR         | 147                              |     |
| At4 |  | APGGQLTTTTDVENFPGFPDGVTPDLM  | DKMRKQAERWGTEMVTEVDVIQVDFSRPFVIR         | 105                              |     |
| At3 |  | APGGQLTTTTDVENFPGFPDGVTPDLM  | DKMRKQAERWGTEMVTEVDVIQVDFSRPFVIR         | 105                              |     |
| At6 |  | APGGQLNQPP-RENFPDGVTPDLM     | DKMRKQAERWGTEMVTEVDVIQVDFSRPFVIR         | 104                              |     |
| Mt1 |  | APGGQLTTTTDVENFPGFPDGVTPDLM  | DKMRKQAERWGTEMVTEVDVIQVDFSRPFVIR         | 145                              |     |
| Os2 |  | AAGGQLTTTTDVENFPGFPDGVTPDLM  | DKMRKQAERWGTEMVTEVDVIQVDFSRPFVIR         | 107                              |     |
| Os3 |  | AAGGQLTTTTDVENFPGFPDGVTPDLM  | DKMRKQAERWGTEMVTEVDVIQVDFSRPFVIR         | 107                              |     |
| Os1 |  | AAGGQLTTTTDVENFPGFPDGVTPDLM  | DKMRKQAERWGTEMVTEVDVIQVDFSRPFVIR         | 107                              |     |
| Hv2 |  | AAGGQLTTTTDVENFPGFPDGVTPDLM  | DKMRKQAERWGTEMVTEVDVIQVDFSRPFVIR         | 107                              |     |
| Hv1 |  | AAGGQLTTTTDVENFPGFPDGVTPDLM  | DKMRKQAERWGTEMVTEVDVIQVDFSRPFVIR         | 107                              |     |
| Ta  |  | AAGGQLTTTTDVENFPGFPDGVTPDLM  | DKMRKQAERWGTEMVTEVDVIQVDFSRPFVIR         | 107                              |     |
| Os4 |  | AAGGQLTTTTDVENFPGFPDGVTPDLM  | DKMRKQAERWGTEMVTEVDVIQVDFSRPFVIR         | 107                              |     |
| Os5 |  | AAGGQLTTTTDVENFPGFPDGVTPDLM  | DKMRKQAERWGTEMVTEVDVIQVDFSRPFVIR         | 116                              |     |
| Os6 |  | AAGGQLTTTTDVENFPGFPDGVTPDLM  | DKMRKQAERWGTEMVTEVDVIQVDFSRPFVIR         | 144                              |     |
| Os7 |  | -----                        | LTTTTTDVENFPGFPDGVTPDLM                  | DKMRKQAERWGTEMVTEVDVIQVDFSRPFVIR | 118 |
| NC  |  | AAGGQLTTTTTEIENFPGFPDGVTPDLM | DKMRKQAERWGTEMVTEVDVIQVDFSRPFVIR         | 99                               |     |
| Pc  |  | AAGGQLTTTTTEIENFPGFPDGVTPDLM | DKMRKQAERWGTEMVTEVDVIQVDFSRPFVIR         | 100                              |     |
| Sc  |  | AAGGQLTTTTTEIENFPGFPDGVTPDLM | DKMRKQAERWGTEMVTEVDVIQVDFSRPFVIR         | 100                              |     |
| Ec  |  | --GGQLTTTTTEVENWPGDNDL       | TGPELLMERMHEHATKFETEIIIFDHINKVDLQNRPFRLN | 98                               |     |
| Yp  |  | --GGQLTTTTTEVENWPGDNDL       | TGPELLMERMHEHATKFETEIIIFDHINKVDLQNRPFRLN | 98                               |     |
| Hi  |  | --GGQLTTTTTEIENWPGDNDL       | TGPELLMERMHEHATKFETEIIIFDHINKVDLQNRPFRLN | 98                               |     |

\* . \*\*:\*\* \* : : : : : . : . \*\*

|     |  |          |                                  |                        |     |
|-----|--|----------|----------------------------------|------------------------|-----|
| At7 |  | TSE----- | RKVKCHSIIYATGATARRLRLPRE----     | EEFWSRGISACAICDGASPLFK | 228 |
| At8 |  | TSE----- | RKVKCHSIIYATGATARRLRLPRE----     | EEFWSRGISACAICDGASPLFK | 228 |
| Os8 |  | SSD----- | REVKCHSVIIATGATAKRLRLPRE----     | DEFWSRGISACAICDGASPLFK | 187 |
| Hv3 |  | SSD----- | REVKCHSVIIATGATAKRLRLPRE----     | EEFWSRGISACAICDGASPLYK | 150 |
| Mt2 |  | SSE----- | RKVKSHTVIIATGATAKRLRLPRE----     | DEFWSRGISACAICDGASPLFK | 213 |
| Ol  |  | SSD----- | RTVKANSVIVATGATAKRLGIPAE----     | ATLWSRGISACAICDGASPIFK | 211 |
| Te  |  | SAE----- | RQVYAHSVIICTGATAKRLHLPGE----     | EQYWTGKVSACAICDGATPIFK | 151 |
| Ns  |  | SEE----- | REVKAHTIIIIATGATAKRLGLPSE----    | HEFWSRGISACAICDGATPIFH | 178 |
| Pm  |  | TLE----- | GSIKSNSIIIIATGASANRLGVINE----    | DKFWSKGISACAICDGATPQFR | 155 |
| At1 |  | TDS----- | RTVLADSVIIISTGAVAKRLSFTGSGEGNGGF | WNRGISACAVCDGAAPIFR    | 208 |
| At5 |  | TDS----- | RTVLADSVIIISTGAVAKRLSFTGSGEGNGGF | WNRGISACAVCDGAAPIFR    | 127 |
| At2 |  | TDS----- | KAILADAVILATGAVAKRLSFGVSGEASGGF  | WNRGISACAVCDGAAPIFR    | 200 |
| At4 |  | TDS----- | KAILADAVILATGAVAKRLSFGVSGEASGGF  | WNRGISACAVCDGAAPIFR    | 158 |
| At3 |  | TDS----- | KAILADAVILAIGAVAKRLSFGVSGEVLGGF  | WNRGISACAVCDGAAPIFR    | 158 |

At6 TDS-----KAILADAVILAIGAVAKWLSFVGSGEVLGGLWNRGISACAVCDGAAPIFR 157  
 Mt1 TDS-----RTVEADSVIVATGAVAKRLPFTGSGDGPNGYWNRGISACAVCDGAAPIFR 198  
 Os2 SDS-----TTVLADAVVVATGAVARRLHFAGS----DAYWNRGISACAVCDGAAPIFR 156  
 Os3 SDS-----TTVLADAVVVATGAVARRLHFAGS----DAYWNRGISACAVCDGAAPIFR 156  
 Os1 SDS-----TTVLADAVVVATGAVARRLHFAGS----DAYWNRGISACAVCDGAAPIFR 156  
 Hv2 SDS-----TTVLADTVVVATGAVARRLYFSGS----DTYWNRGISACAVCDGAAPIFR 156  
 Hv1 SDD-----TVVHADSVVVATGAVARRLHFAGS----DAFWNRGISACAVCDGAAPIFR 156  
 Ta SDD-----TVVHADSVVVATGAVARRLHFAGS----DAFWNRGITACAVCDGAAPIFR 156  
 Os4 SGD-----TVVHADAVVVATGAVARRLHFAGS----DAFWNRGISACAVCDGAAPIFR 156  
 Os5 SGD-----TVVHADAVVVATGAVARRLHFAGS----DAFWNRGISACAVCDGAAPIFR 165  
 Os6 SGD-----TVVHADAVVVATGAVARRLHFAGS----DAFWNRGISACAVCDGAAPIFR 193  
 Os7 SGD-----TVVHADAVVVATGAVARRLHFAGS----DAFWNRGISACAVCDGAGPIFR 167  
 NC TEWSPEE---YHTADSIILATGASARRLHLPGE----EKYWQNGISACAVCDGAVPIFR 151  
 Pc TEWNDEGSEPVRTADAVIIATGANARRLNLPGE----ETYWQNGISACAVCDGAVPIFR 156  
 Sc TEFNEDAEP---VTTDAIILATGASAKRMHLPGE----ETYWQKGISACAVCDGAVPIFR 153  
 Ec GDN-----GEYTCDALIIATGASARYLGLPSE----EAFKGRGVSA CATCDG--FFYR 145  
 Yp GDG-----AEYTCDALIIATGASARYLGMASE----EAFKKGKGVSA CATCDG--FFYR 145  
 Hi GDV-----QNFTCDALIIATGASARYIGLPSE----ENYKGRGVSA CATCDG--FFYR 145

. : : : . \* \* \* . : . . . \* : : \* \* \* \* \* \* \* \* : :

At7 GQVLAVVGGGDTATEEALYLTKYARHVHLLVRRDQLRASKAMQDRVINNP---NITVHYN 285  
 At8 GQVLAVVGGGDTATEEALYLTKYARHVHLLVRRDQLRASKAMQDRVINNP---NITVHYN 285  
 Os8 GQVLAVVGGGDTATEEAIYLTKYARHVHLLVRKDQLRASKAMQDRVLNPN---NITVHFN 244  
 Hv3 GQVLAVVGGGDTATEEAIYLTKYACHVHLLVRRDQLRASKAMQDRVLNPN---NITVHFN 207  
 Mt2 GQILAVVGGGDTATEEALYLTKYARHVHLLVRRDQLRASKAMQDRVYDNP---NVTVHFN 270  
 Ol GEEVAVVGGGDTATEEAVYLTKYAKHVHLLVVRGSTMASKAMQDRVLOHK---AITVHYN 268  
 Te DVELAVI GGGDSA AEEAVYLTKYGSHVHLLVRS DKMRASKAMQDRVFNPN---KITVHWQ 208  
 Ns GAELAVI GAGDSA AEEESIYLTKYGSKVNLLVRS EKMASKAMQDRVLSNP---KIQVHWN 235  
 Pm NEELAVI GGGDSA CEEAAYLTKYGSKVHLLVRS EKLRSAA MIDRVKANS---KIEIHWN 212  
 At1 NKPLVVI GGGDSAMEEANFLTKYGSKVYI IHRRTFRASKIMQQRALSNP---KIEVIWN 265  
 At5 NKPLVVI GGGDSAMEEANFLTKYGSKVYI IHRRTFRASKIMQQRALSNP---KIEVIWN 184  
 At2 NKPLAVI GGGDSAMEEANFLTKYGSKVYI IHRRAFRASKIMQQRALSNP---KIDVIWN 257  
 At4 NKPLAVI GGGDSAMEEANFLTKYGSKVYI IHRRAFRASKIMQQRALSNP---KIDVFWN 215  
 At3 NKPLAVI GGGDSAMEEANFLTKYGSKVYI IHRRAFRASKIMQQRALSNP---KIDVIWN 215  
 At6 NKPLAVI GGGDSAMEEANFLTKYGSKVYI IDRRDAFRASKIMQQRALSNP---KIDVIWN 214  
 Mt1 NKPLAVI GGGDSAMEEATFLTKYGSEVYI IHRRTFRASKIMQSKALSNE---KIKVIWN 255  
 Os2 NKPIAVI GGGDSAMEESNFLT KYGSHVYI IHRNTFRASKIMQARALSNP---KIQVFW 213  
 Os3 NKPIAVI GGGDSAMEESNFLT KYGSHVYI IHRNTFRASKIMQARALSNP---KIQVFW 213  
 Os1 NKPIAVI GGGDSAMEESNFLT KYGSHVYI IHRNTFRASKIMQARALSNP---KIQVFW 213  
 Hv2 NKPIAVI GGGDSAMEEGNFLT KYGSQVYI IHRNTFRASKIMQARALSNP---KIQVWD 213  
 Hv1 NKPIAVV GGGDSAMEEANFLTKYGSRVYI IHRRAFRASKIMQARALSNP---KIQVWD 213  
 Ta NKPIAVV GGGDSAMEEANFLTKYGSRVYI IHRRAFRASKIMQARALSNP---KIQVWD 213  
 Os4 NKPIAVV GGGDSAMEEANFLTKYGSRVYI IHRRAFRASKIMQARALSNP---KIQVWD 213  
 Os5 NKPIAVV GGGDSAMEEANFLTKYGSRVYI IHRRAFRASKIMQARALSNP---KIQVWD 222  
 Os6 NKPIAVV GGGDSAMEEANFLTKYGSRVYI IHRRAFRASKIMQARALSNP---KIQVWD 250  
 Os7 NKPIAVV GGGDSAMEEANFLTKYGSRVYI IHRRAFRASKIMQARALSNP---KIQVWD 224  
 NC NKHLVVI GGGDSA AEEAMFLTKYGSHTVLRKDKLRASSIMAHRLLNHE---KVTVRFN 208  
 Pc NKPLYVI GGGDSA AEEAMFLAKYGSVTVLRKDKLRASSIMADRLLAHP---KCKVRFN 213  
 Sc NKPLAVI GGGDSA CEEAQFLT KYGSKVFLVRKDH LRASTIMQKRAEKNE---KIEILYN 210  
 Ec NQKVAVI GGGNTAVEEALYLSNIASEVHLIHRRDGFRAEKILIKRLMDKVENGNIILHTN 205  
 Yp NQKVAVV GGGNTAVEEALYLANIAAEVHLIHRRTFRSEKILIDRLMEKVKNGNIVLHTD 205  
 Hi NKPVGVI GGGNTAVEEALYLANIASTVHLIHRRDSFRAEKILIDRLYKKEEGKIVLHTD 205

. : \* : \* \* : \* \* \* . : \* : : . \* : : \* . : \* : : : : : : : : :

At7 TETVDVLSNTK--GQMSGILLRRL-DTGEETELEAKGLFYGIGHSPNSQLLEGQVELDSS 342  
 At8 TETVDVLSNTK--GQMSGILLRRL-DTGEETELEAKGLFYGIGHSPNSQLLEGQVELDSS 342  
 Os8 TEAVDVVSNPK--GQMSGIQLKRT-DTGEESVLEVKGLFYGIGHTPNSQLLQGDIDLDDA 301  
 Hv3 TEAVDVVGNTK--GQMSGIQLRRI-DTGEKLVLEVKGLFYGIGHTPNSQLLEGQIELDSS 264  
 Mt2 TETVDIVSNTK--GQMSGILVRKL-DSGEESVLEAKGLFYGIGHSPNTQLLKGQVELDQS 327

Ol TECVDGSPNSK--GNLGALKLRDT--NNGDERQLKVKGLFYGIGHTPNSKIFGNQIELDEA 325  
 Te TEAREILGDGN---LMTGLRI INK--ATGEESLLPVRGLFYAIGHTPNTQLFKDFLELDSV 264  
 Ns TEVVDVFGNG----HMDGVKVRNN--QTGEETNVHAKGLFYAIGHKPNTSLFQGGLELDEI 290  
 Pm TKVEK--ANGT--DWLENVETINS--HKGN--VEIKVKGLFYAIGHTPNTKFLNNKIELDKK 266  
 At1 SAVVEAYGDEN--GRVLGGLKVKNV--VTGDVSDLKVSGLFFAIGHQPATKFLDGGQLELDED 323  
 At5 SAVVEAYGDEN--GRVLGGLKVKNV--VTGDVSDLKVSGLFFAIGHQPATKFLDGGQLELDED 242  
 At2 SSVVEAYGDGE--RDVLGGLKVKNV--VTGDVSDLKVSGLFFAIGHQPATKFLDGGVVELDSD 315  
 At4 SSVVEAYGDGE--RDVLGGLKVKNV--VTGDVSDLKVSGLFFAIGHQPATKFLDGGVVELDSD 273  
 At3 SSVVEAYGDGE--RDVLGGLKVKNV--VTGDVSDLKVSGLFFAIGHQPATKFLDGGVVELDSD 273  
 At6 SSVVEAYGDGE--RDVLGGLKVKNV--VTGDVSDLKVSGLFFAIGHQPATKFLDGGVVELDSD 272  
 Mt1 SMVVEAFGDGE--NKKLGGLKVENV--VTKEVTDLQVSGGLFFAIGHQPATKFLDGGQLELSD 313  
 Os2 SEVVEAYGGEG--GGPLAGVKVKNL--VTGKISDLQVSGGLFFAIGHQPATKFLGGQLELSD 271  
 Os3 SEVVEAYGGEG--GGPLAGVKVKNL--VTGKISDLQVSGGLFFAIGHQPATKFLGGQLELSD 271  
 Os1 SEVVEAYGGEG--GGPLAGVKVKNL--VTGKISDLQVSGGLFFAIGHQPATKFLGGQLELSD 271  
 Hv2 SEVVEAYGGAG--GGPLAGVKVKNL--VTGEVSDLQVSGGLFFAIGHQPATKFLNGQLELHAD 271  
 Hv1 SEVVEAYGGSD--GGPLAGVKVKNL--VSGEVSDVQVAGLFFAIGHQPATKFLAGQLELSD 271  
 Ta SEVVEAYGGSD--GGPLGGVKVKNL--VTGEVSDFRVAGLFFAIGHQPATKFLAGQLELSD 271  
 Os4 SEVVEAYGGAD--GGPLAGVKVKNL--VSGEVSDLQVAGLFFAIGHQPATKFLGGQLELSD 271  
 Os5 SEVVEAYGGAD--GGPLAGVKVKNL--VSGEVSDLQVAGLFFAIGHQPATKFLGGQLELSD 280  
 Os6 SEVVEAYGGAD--GGPLAGVKVKNL--VSGEVSDLQVAGLFFAIGHQPATKFLGGQLELSD 308  
 Os7 SEVVEAYGGAD--GGPLAGVKVKNL--VSGEVSDLQVAGLFFAIGHQPATKFLGGQLELSD 282  
 NC TVGVEVKGDDK--GLMSHLVVKDV--TTGKEETLEANGLFYAIGHDPATALVKGQLELSD 265  
 Pc TVATEVIGENKPNGLMTHLRVKDV--LSNAEEVVEANGLFYAVGHDPASGLVKGQVELDDE 272  
 Sc TVALEAKGDGK---LLNALRIKNT--KKNEETDLPVSGGLFYAIGHTPATKIVAGQVDTDEA 266  
 Ec RTLEEVTGDQM---GVTGVRLRDTQNSDNIESLDVAGLFFAIGHSPNTAIFEGQLELEN- 261  
 Yp RTLDEVLGDDM---GVTGVRLKST--HSDETEELAVAGVFIAIGHSPNTGIFSDQLALEN- 260  
 Hi RTLDEVLGDNM---GVTGLRLANT--KTGEKEELKLDGLFVAIGHSPNTEIFQGGLELNN- 260

. : : . . . . . : : : : . . . . .

At7 GYVLVREGT----SNTSVEGVFAAGDVQDHEWRQAVTAAGSG----CIAALSAERYLTSN 394  
 At8 GYVLVREGT----SNTSVEGVFAAGDVQDHEWRQAVTAAGSG----CIAALSAERYLTSN 394  
 Os8 GYILVEEGT----AKTSVDGVFAAGDVQDHEWRQAVTAAGSG----CVAALSVERYLVAN 353  
 Hv3 GYILVEEGT----AKTSVDGVFAAGDVQDHEWRQAVTAAGSG----CIAALSVERYLVSS 316  
 Mt2 GYLLVKEGT----AKTSVEGVFAAGDVQDHEWRQAVTAAGSG----CIAALSVERYLVSS 379  
 Ol GYVVVREGT----R--T--SIEGVFSAGDLHDQEFRQAITAAGSG----CMAAISVERYLTK 376  
 Te GYIVTRHG----TQTINVEGVFAAGDVQDHEWRQAVTAAGSG----CMAALDAERWLSAR 315  
 Ns GYVVTKHGS----PETSVEGVFAAGDVQDHEWRQAVTAAGSG----CAAALLAERWLSAN 342  
 Pm GYIACNSGR----PETSIEGIFAAGDVVDSEWRQGVTAAGTG----CMAALAAERWLAEK 318  
 At1 GYVVTKPGT----TKTSVVGVFAAGDVQDKKYRQAITAAGTG----CMAALDAEHY---- 371  
 At5 GYVVTKPGT----TKTSVVGVFAAGDVQDKKYRQAITAAGTG----CMAALDAEHY---- 290  
 At2 GYVVTKPGT----TQTSVPGVFAAGDVQDKKYRQAITAAGTG----CMAALDAEHY---- 363  
 At4 GYVVTKPGT----TQTSVPGVFAAGDVQDKKYRQAITAAGTG----CMAALDAEHY---- 321  
 At3 GYVVTKPGT----TQTSVPGVFAAGDVQDKKYRQAITAAGTG----CMAALDAEHY---- 321  
 At6 GYVVTKPGT----TQTSVPGVFAAGDVQDKKYRQAITAAGTG----CMAALDAEHY---- 320  
 Mt1 GYVVTKPGT----TKTSVEGVFAAGDVQDKKYRQAITAAGSG----CMAALDAEHF---- 361  
 Os2 GYVATKPGS----THTSVKGVFAAGDVQDKKYRQAITAAGS-----EISCFMGCYL---- 318  
 Os3 GYVATKPGS----THTSVKGVFAAGDVQDKKYRQAITAAGS-----EISRFMGCYL---- 318  
 Os1 GYVATKPGS----THTSVKGVFAAGDVQDKKYRQAITAAGSG----CMAALDAEHY---- 319  
 Hv2 GYVATKPGS----THTSVEGVFAAGDVQDKKYRQAITAAGSG----CMAALDAEHY---- 319  
 Hv1 GYVATKPGS----THTSVKGVFAAGDVQDKKYRQAITAAGSG----CMAALDAEHY---- 319  
 Ta GYVATKPGS----THTSVKGVFAAGDVQDKKYRQAITAAGSG----CMAALDAEHY---- 319  
 Os4 GYVVTKPGS----THTSVKGVFAAGDVQDKKYRQAITAAGSG----CMAALDAEHY---- 319  
 Os5 GYVVTKPGS----THTSVKGVFAAGDVQDKKYRQAITAAGSG----CMAALDAEHY---- 328  
 Os6 GYVVTKPGS----THTSVKGVFAAGDVQDKKYRQAITAAGSDRRPSQAQCLSEERVGKT 364  
 Os7 GYVVTKPGS----THTSVKGVFAAGDVQDKKYRQAITAAGSDRRPSQAQCLSEERVGKT 338  
 NC GYVVTKPGT----TLTSVEGVFAAGDVQDKRYRQAITSAGTG----CMAALDAEKF---- 313  
 Pc GYIITKPGT----SFTINVEGVFACGDVQDKRYRQAITSAGSG----CVAALEAEKF---- 320  
 Sc GYIKTVPGS----SLTSVPGFFAAGDVQDSKYRQAITSAGSG----CMAALDAEKY---- 314  
 Ec GYIKVQSGIHGNATQTSIPGVFAAGDVMDHIYRQAITSAGTG----CMAALDAERY---- 313

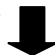

Yp GYIKVQSGLQGNATQTSIPGVFAAGDVM<sup>1</sup>MDHIYRQAITSAGTG----CMAALDAERY---- 312  
 Hi GYIVVKSGLDGNATAISVEGVFAAGDVM<sup>1</sup>MDHNRYRQAITSAGTG----CMAALDAERY---- 312  
 \*\*: \* \* \* \* \* : \* \* \* \* \* :

At7 NLLVKFHQPQTE----EAKKEFTQRD-----VQEKFDITLTKHKGQYALRKLYHESPRV 444  
 At8 NLLVEFHQPQTE----EAKKEFTQRD-----VQEKFDITLTKHKGQYALRKLYHESPRV 444  
 Os8 DLLVEFHQPVRE----EKEKEITDRD-----VEMGFDISHTKHRGQYALRKVYHESPRL 403  
 Hv3 DLLIEFHQPVRE----EKKKEIEGKD-----VEMGFDIHTTKHKGQYALRKLYHGSPRL 366  
 Mt2 GLLIEFHQPKHE----EVKKELTDRD-----VQAGFDITLTKHKGQYALRKLYHDSPL 429  
 Ol NLLVEHHQTKQRKS-VEREESVSEERAIQGEDEDSFDINVTKHYGQYALRKLYHESDRV 435  
 Te GLIQEFHQQRAT----ETQPAATAKPTAS---PQQEFDPNAIKHRGSYALRKLPHESDRL 367  
 Ns ALIQEFHQEATINNELETQPVA-QKTEAE---QEAGFDVNATRHHAGGYALRKLPHESDRL 398  
 Pm NLSKIIIVRETSE----PEKTLSSSSFNNEEVTNEDTFNLNSEWQKGSYALRKLYHESNKP 373  
 At1 -----  
 At5 -----  
 At2 -----  
 At4 -----  
 At3 -----  
 At6 -----  
 Mt1 -----  
 Os2 -----  
 Os3 -----  
 Os1 -----  
 Hv2 -----  
 Hv1 -----  
 Ta -----  
 Os4 -----  
 Os5 -----  
 Os6 -----  
 Os7 -----  
 NC -----  
 Pc -----  
 Sc -----  
 Ec -----  
 Yp -----  
 Hi -----

At7 ILLVLYTSPTCGPCRTLKPIILNKVVDEYNHVDVHFVEIDIEEDQEIAEAAGIMGTPCVQFFK 504  
 At8 ILLVLYTSPTCGPCRTLKPIILNKVVDEYNHVDVHFVEIDIEEDQEIAEAAGIMGTPCVQFFK 504  
 Os8 VCVLYTSPTCGPCRTLKPIILNKVVDEYNHVDVHFVEIDIEEDPEIAEAAGIMGTPCVQFFK 463  
 Hv3 ILLVLYTSPTCGPCRTLKPIILNKVVDEYNHVDVHFVEIDIEEDPEIAEAAGIMGTPCVQFFK 426  
 Mt2 ILLVLYTSPTCGPCRTLKPIILNKVVDEYNHVDVHFVEIDIEEDPEIAEAAGIMGTPCVQFFK 489  
 Ol VMVMYSAPTCGPCRRLKPMPLDKVIAEYGDKVHYVEIDIAADPEIAEAAGVTGTPMTQIFY 495  
 Te LLVKYVSPTCGPCRTLKPIILNKVVDEYNHVDVHFVEIDIEEDPEIAEAAGVTGTPMTQIFY 427  
 Ns LIVKYVSPCGPCRTLKPIILNKVVDEYNHVDVHFVEIDIEEDPEIAEAAGVTGTPMTQIFY 458  
 Pm ILLVIFSSPCGPCRRLKPMPLDKVIAEYGDKVHYVEIDIEEDPEIAEAAGVTGTPMTQIFY 433  
 At1 -----LQEIGSQEGKSD----- 383  
 At5 -----LQEIGSQEGKSD----- 302  
 At2 -----LQEIGSQEGKSD----- 375  
 At4 -----LQEIGSQEGKSD----- 333  
 At3 -----LQEIGSQEGKSD----- 333  
 At6 -----LQEIGSQEGKSD----- 332  
 Mt1 -----LQGVGLQQDKSD----- 373  
 Os2 -----LVRIAIEIVQGLSM----- 332  
 Os3 -----LVRIAIEIVQGLSM----- 332  
 Os1 -----LQEVGAQEGKAD----- 331  
 Hv2 -----LQEVGAQEGKAD----- 331  
 Hv1 -----LQEVGAQEGKAD----- 331

|     |                                |     |
|-----|--------------------------------|-----|
| Ta  | -----LQEVGAQEGKTD-----         | 331 |
| Os4 | -----LQEIGAQEDKTD-----         | 331 |
| Os5 | -----LQEIGAQEDKTD-----         | 340 |
| Os6 | -----ITEYLSFSGDTS-----         | 376 |
| Os7 | -----ITEYLSFSGDTS-----         | 350 |
| NC  | -----LSEHEETPAEHRDTSVQGNL----- | 334 |
| Pc  | -----IAETET---HQEAKPVL-----    | 334 |
| Sc  | -----LTSLE-----                | 319 |
| Ec  | -----LDGLADAK-----             | 321 |
| Yp  | -----LDGLANDK-----             | 320 |
| Hi  | -----LDAQEA-----               | 318 |

:

|     |                                                      |     |
|-----|------------------------------------------------------|-----|
| At7 | NKEMLRITISGVKMKKEYREFIE-----ANK-----                 | 529 |
| At8 | NKEMLRITISGVKMKKEYREFIE-----ANK-----                 | 529 |
| Os8 | NKEMLRITISGVKMKKEYREFIE-----SNK-----                 | 488 |
| Hv3 | NKEMIRTFSGVCMKKEYREFIE-----SNK-----                  | 451 |
| Mt2 | NKENLKTIVSGVCMKREYREFIE-----ANI-----                 | 514 |
| Ol  | QKERIEVLSGVKMKSEYRRVIDGALGASATKEVTMPAAQAGEKKESPVETSR | 547 |
| Te  | NKELLEVIIVGMKPKSQYRETLQR-----YLS-----                | 453 |
| Ns  | DKELVKEVKGKQKSEYRLLIEG-----NL-----                   | 483 |
| Pm  | DKLLKKQWQGVKQKSEFKEAIQN-----II-----                  | 458 |
| At1 | -----                                                |     |
| At5 | -----                                                |     |
| At2 | -----                                                |     |
| At4 | -----                                                |     |
| At3 | -----                                                |     |
| At6 | -----                                                |     |
| Mt1 | -----                                                |     |
| Os2 | -----                                                |     |
| Os3 | -----                                                |     |
| Os1 | -----                                                |     |
| Hv2 | -----                                                |     |
| Hv1 | -----                                                |     |
| Ta  | -----                                                |     |
| Os4 | -----                                                |     |
| Os5 | -----                                                |     |
| Os6 | -----                                                |     |
| Os7 | -----                                                |     |
| NC  | -----                                                |     |
| Pc  | -----                                                |     |
| Sc  | -----                                                |     |
| Ec  | -----                                                |     |
| Yp  | -----                                                |     |
| Hi  | -----                                                |     |

**Supplemental Figure S1.** Multiple alignment of primary sequences of NTRs from different sources using ClustalW. Active site and the motifs in NADP- and FAD-binding domains are marked with boxes. The region used for phylogenetic analysis is enclosed between arrows. Accession numbers in NCBI protein database are: Os, *Oryza sativa*, Os1 (NP\_001047911), Os2 (EAY87270 ), Os3 (EAZ24372), Os4 (BAD33510), Os5 (NP\_001057531), Os6 (EAZ00754), Os7 (EAZ36842), Os8 (NP\_001060515); At, *Arabidopsis thaliana*, At1 (Q39242), At2 (NP\_195271), At3 (1VDC), At4 (AAO42318), At5 (AAO42318), At6 (CAA80656), At7 (AAL08250), At8 (NP\_565954); Hv,

*Hordeum vulgare*, Hv1 (EU314717), Hv2 (ABX09990), Hv3 (TC132362); Ta, *Triticum aestivum* (CAD19162); Mt, *Medicago truncatula*, Mt1 (ABH10138), Mt2 (ABH10139); Ol, *Ostreococcus lucimarinus* (XP\_001422184); Te, *Thermosynechococcus elongates* (NP\_682714); Ns, *Nostoc sp.* (NP\_484780); Pm, *Prochlorococcus marinus* (NP\_893267) ; Nc, *Neurospora crassa* (P51978); Pc, *Penicillium chrysogenum* (P43496); Sc, *Saccharomyces cerevisiae* (P29509); Ec, *Escherichia coli* (P09625); Yp, *Yersinia pestis* (NP\_404967); Hi, *Haemophilus influenzae* (P43788).
